# Supplementary material
Source: MDPI journal article supplement (https://www.mdpi.com/2673-4605/6/1/26)
Supplement: s1 [file s1]

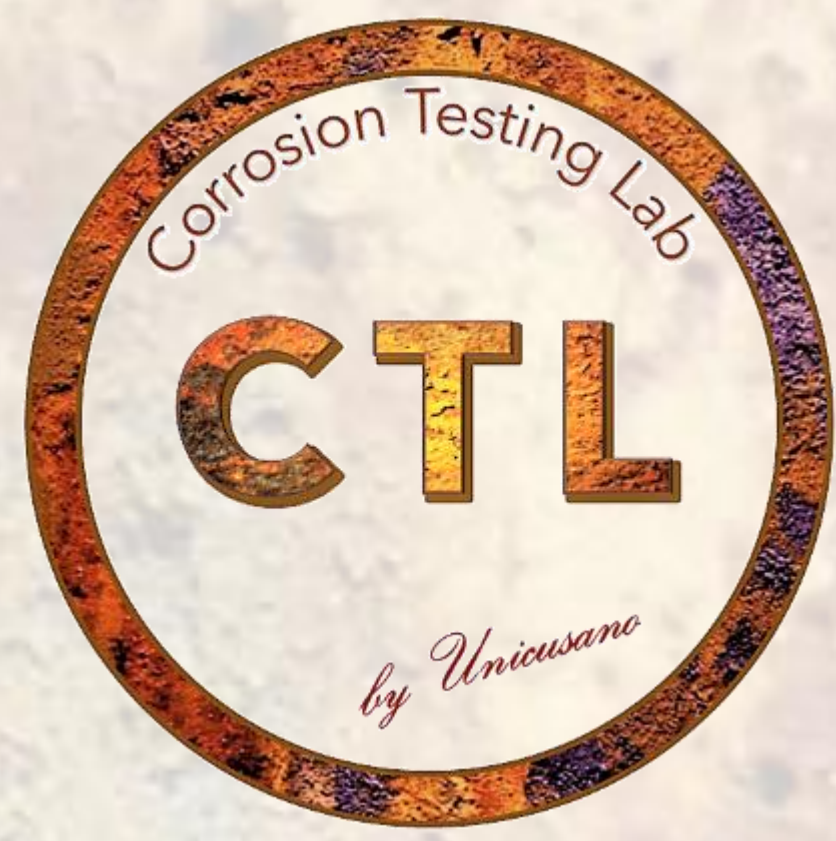

# EXPERIMENTAL TESTS ON BOND PERFORMANCE BETWEEN CORRODED STEEL REINFORCEMENTS AND CONCRETE

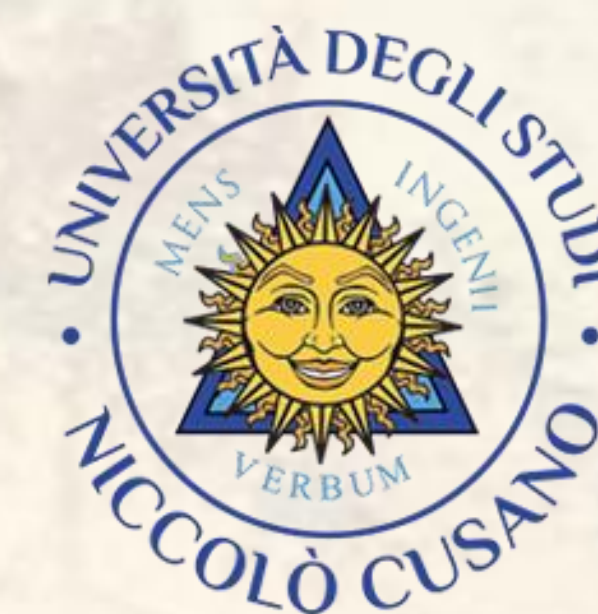

Armando Benenato<sup>1,a</sup>, Barbara Ferracuti<sup>1,b</sup>, Stefania Imperatore<sup>1,c</sup>, Mahdi Kioumarsi<sup>2,d</sup>

<sup>1</sup> Department of Civil Engineering, "Niccolò Cusano" University of Rome, Via Don Carlo Gnocchi, 3, 00166 Rome, Italy

<sup>2</sup> Department of Civil Engineering and Energy Technology, Oslo Metropolitan University, Pilestredet 35, 0166 Oslo, Norway.

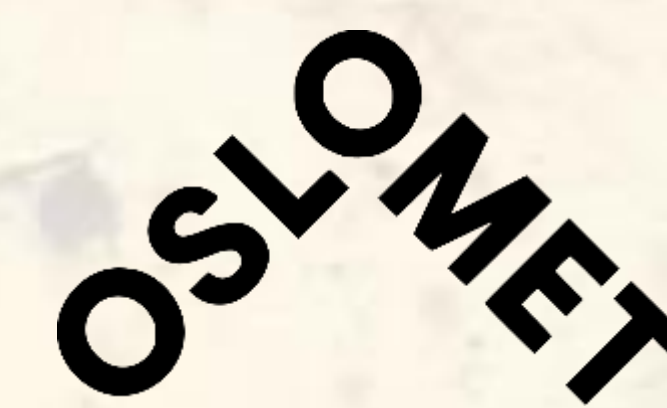

The corrosion of steel bars in concrete is a dangerous and extremely costly problem, that causes losses of serviceability and structural capacity in buildings and bridges. Once that the depassivation occurs, as a result of concrete carbonation or chlorides attack, at the steel-concrete interface the iron oxides expand approximately 2–6 times in volume, causing cracks and bond-slip degradation. In particular, the reinforcement - concrete bond degradation, influences the deformability of the element and consequently its service behaviour. The present study is a part of an extensive research project, CONSTIN, between Oslo Metropolitan University and Niccolò Cusano University aiming to evaluate the steel-to-concrete interaction in the presence of corrosion and to establish a variation law for the bond strength as a function of the corrosion level. The research aims to assess the influence of different level of corrosion on the interface between the concrete and the most typical steel reinforcement typologies (the steel strands, and the smooth and the ribbed bars), characterized by the same diameter (equivalent to 12 mm) and bonded length. The different level of corrosion is reached with a specific duration of exposition of the embedded reinforcements to the accelerated electrolytic corrosion process. Some details about the laboratory procedure, the duration of exposition and the current density will be provided. The preliminary results of the experimental campaign will be presented.

## Reinforcement typologies

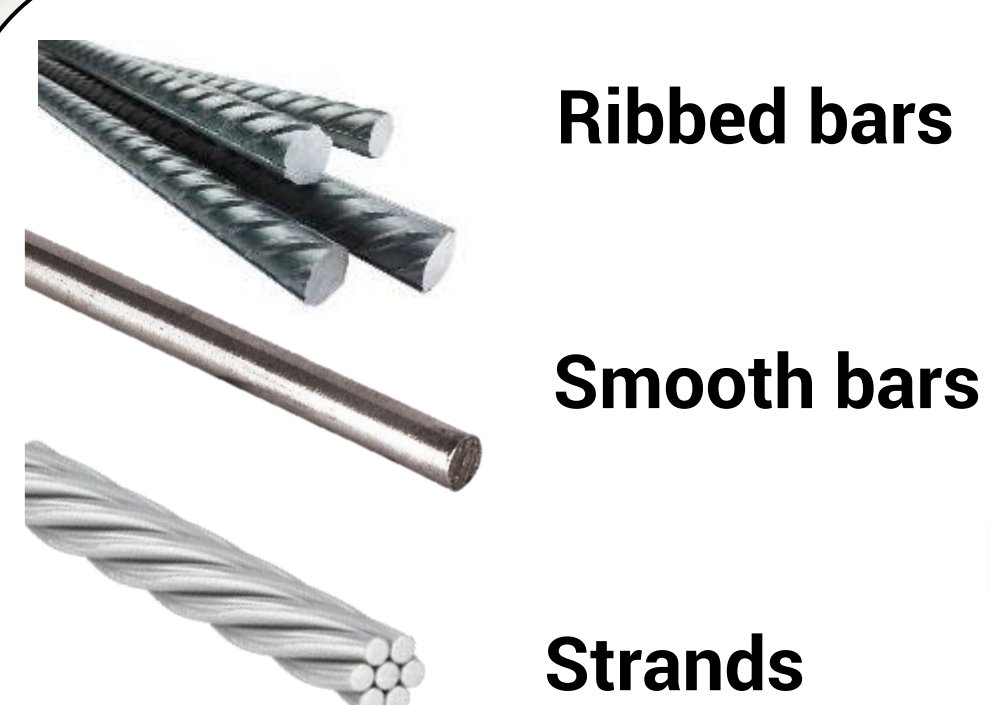

The research will assess the influence of the corrosion degradation on the interaction between the concrete and the most typical steel reinforcement typologies: the steel strands, and smooth and ribbed bars. To compare the results, the reinforcements are characterized by the same diameter (equivalent to 12 mm) and bonded length.

## Type of specimens analysed

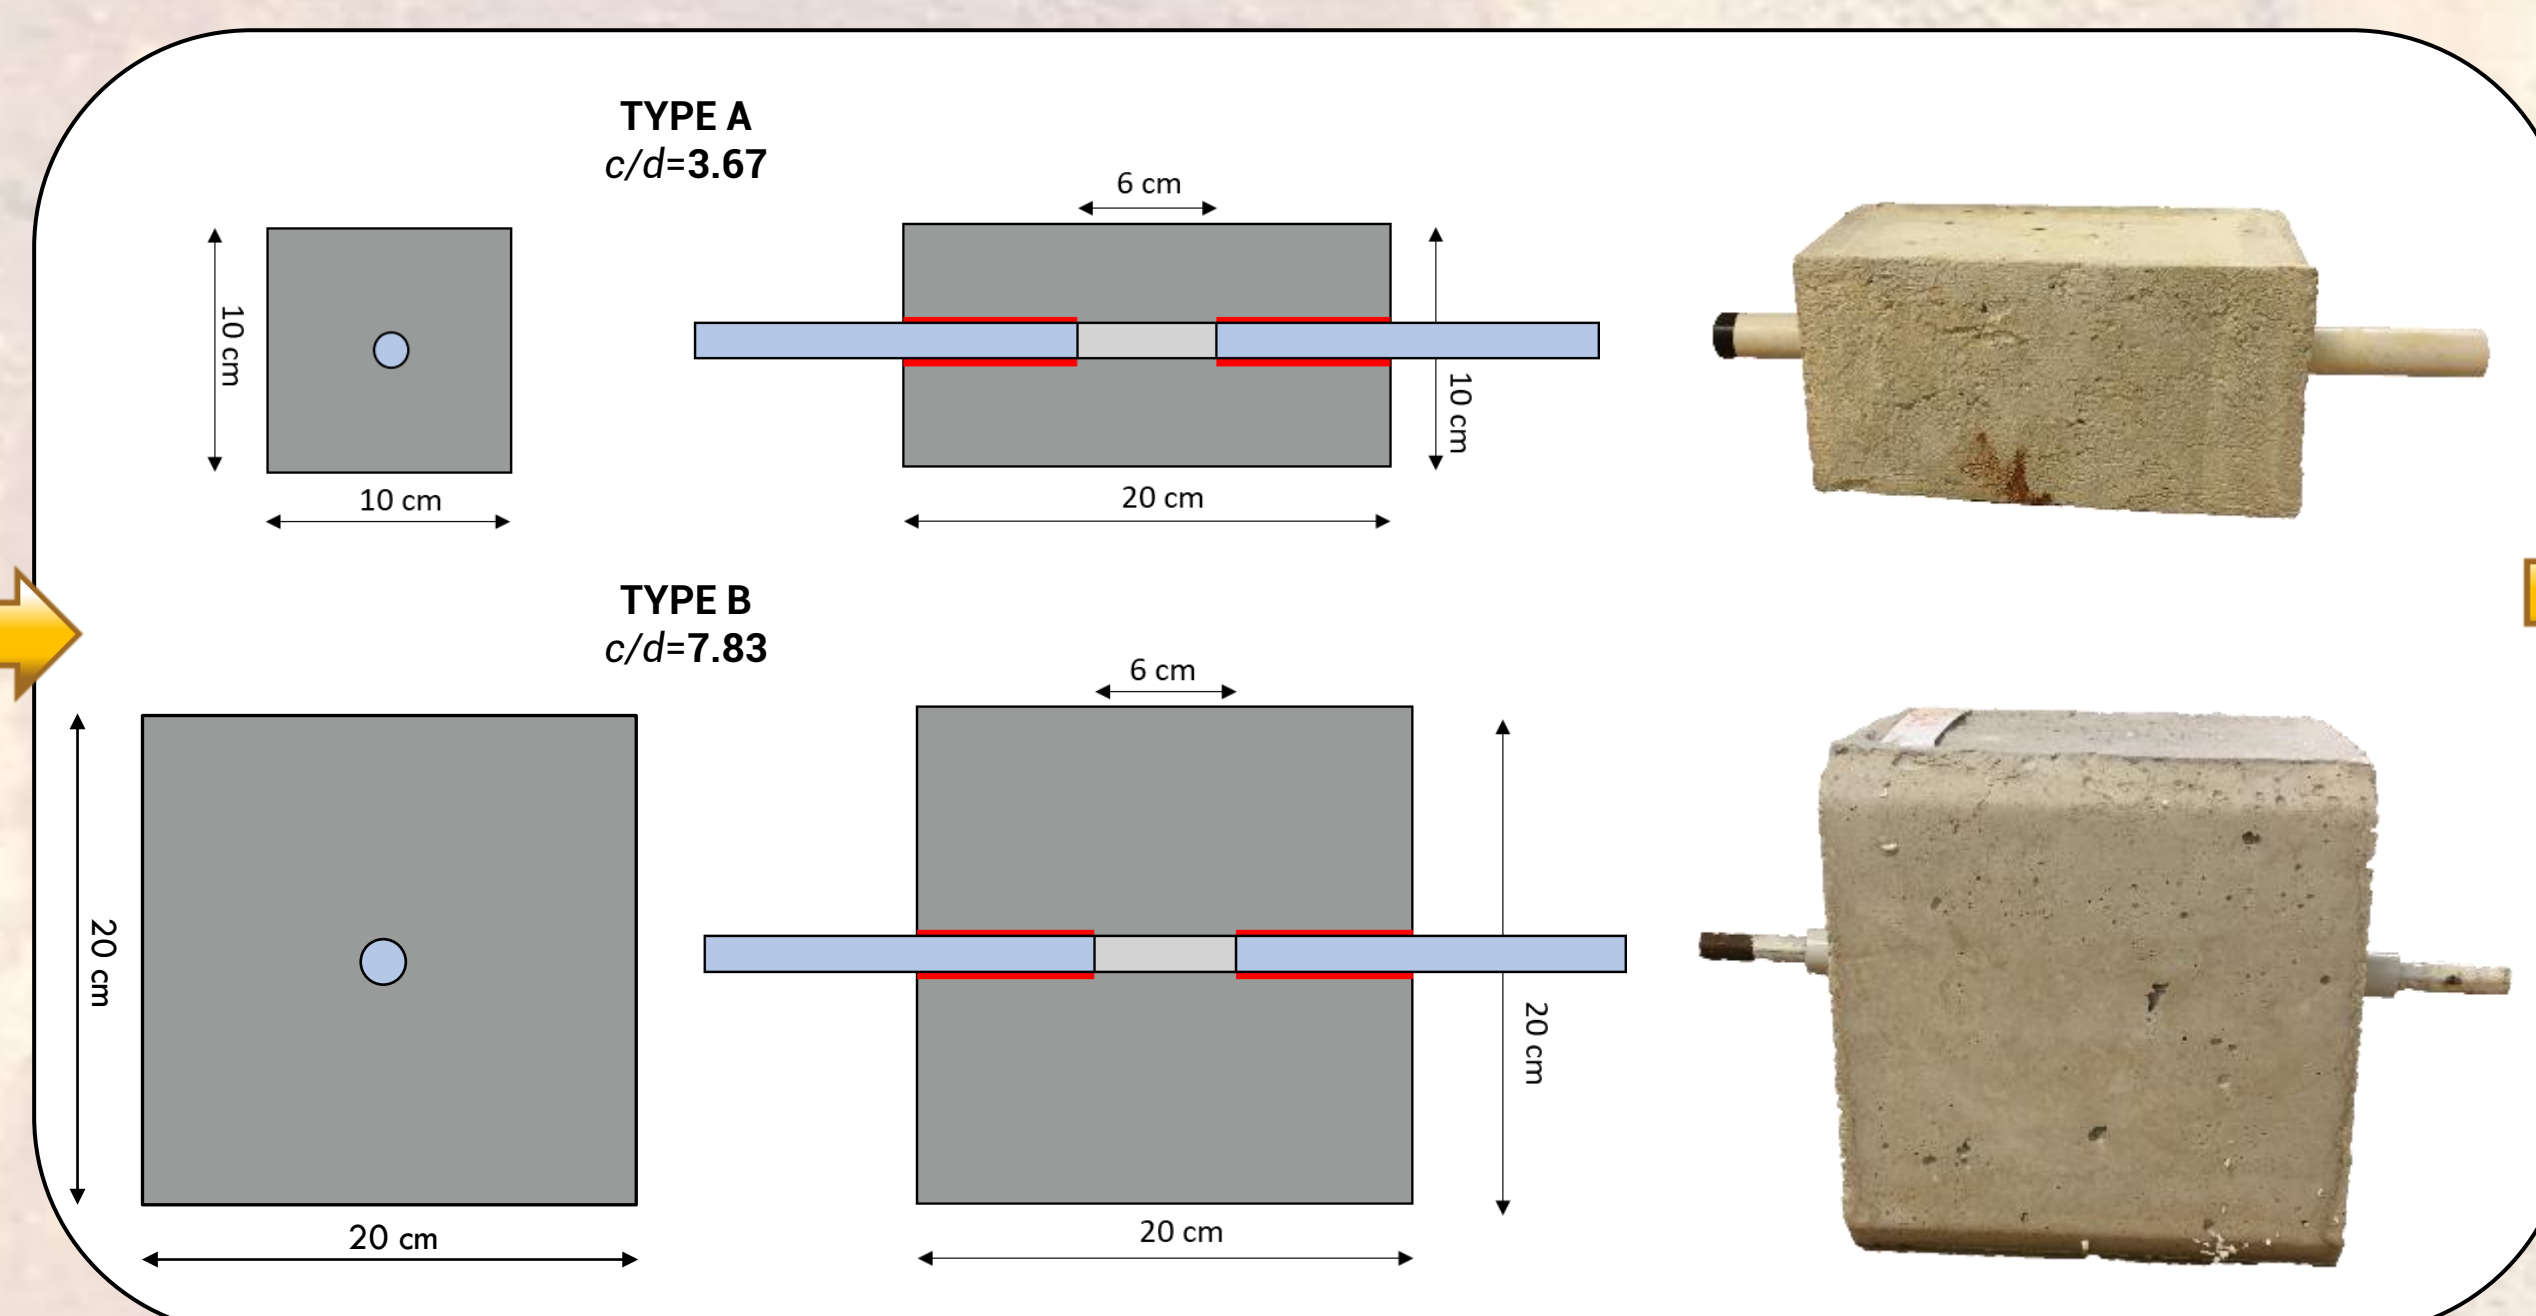

## Particular of specimen preparation

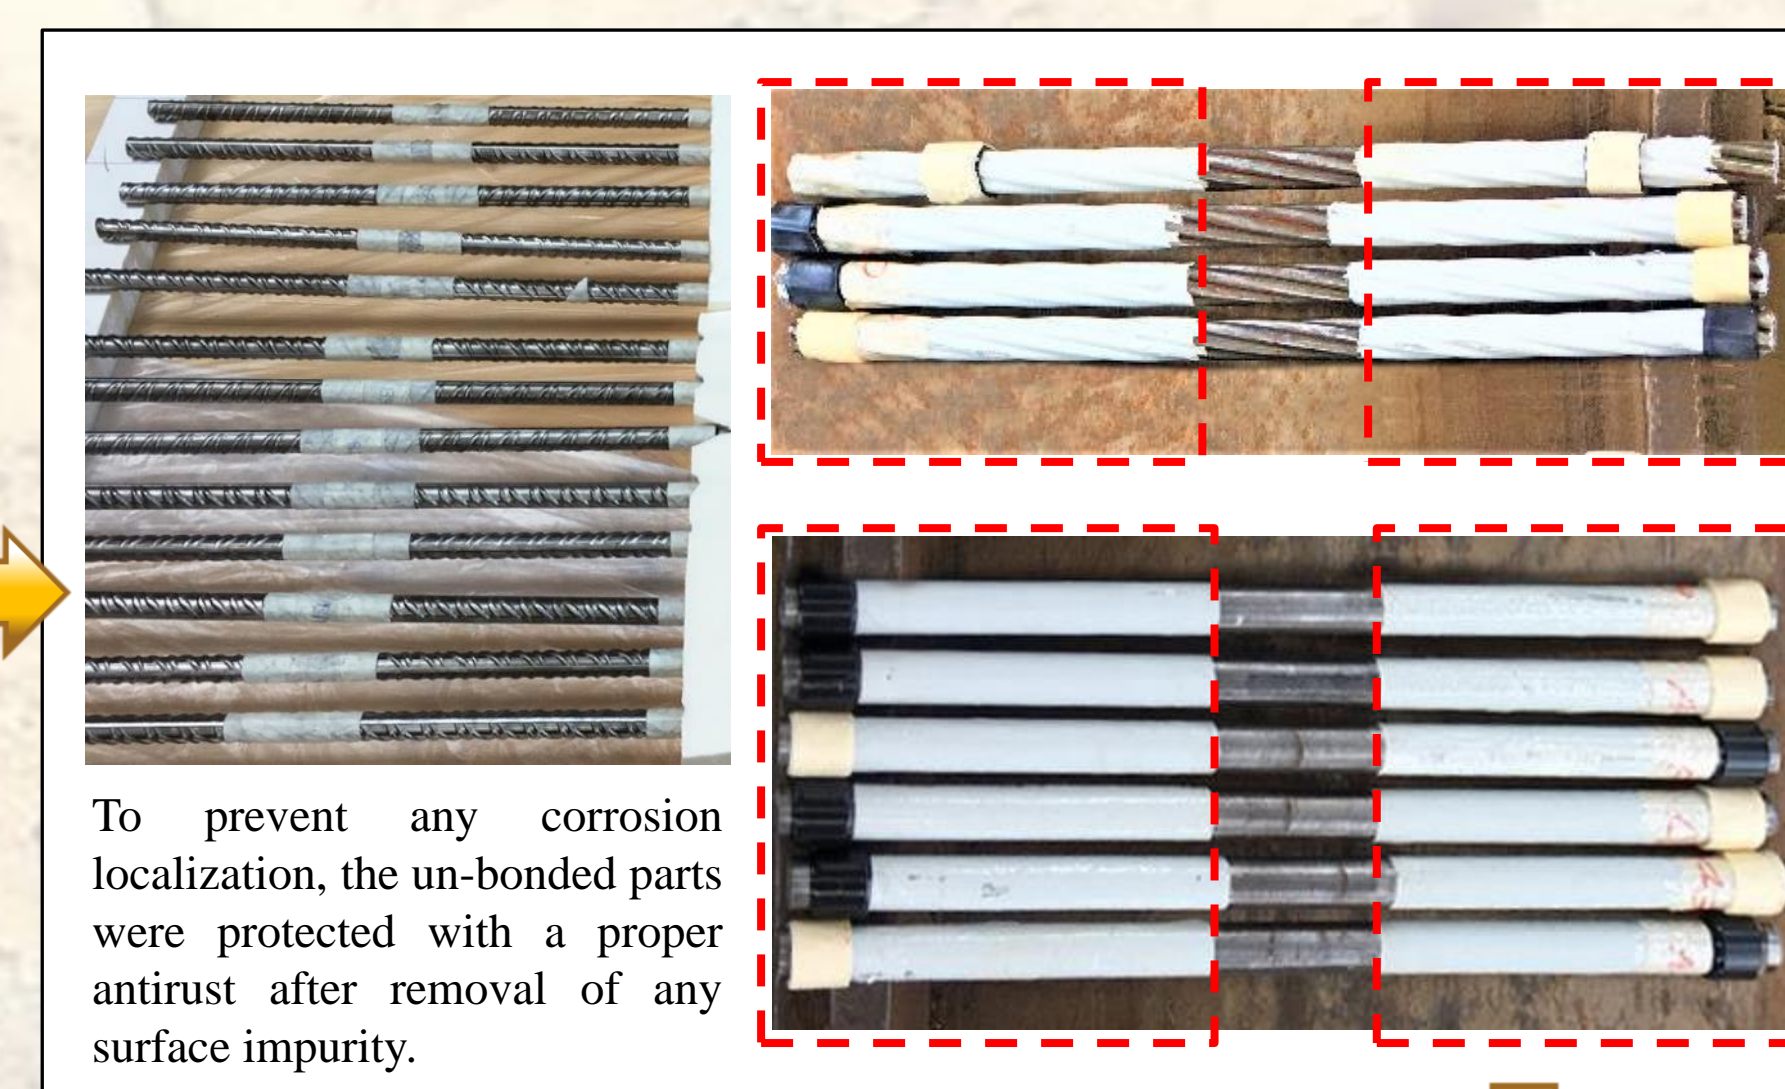

To prevent any corrosion localization, the un-bonded parts were protected with a proper antirust after removal of any surface impurity.

## Pull Out Test Setup

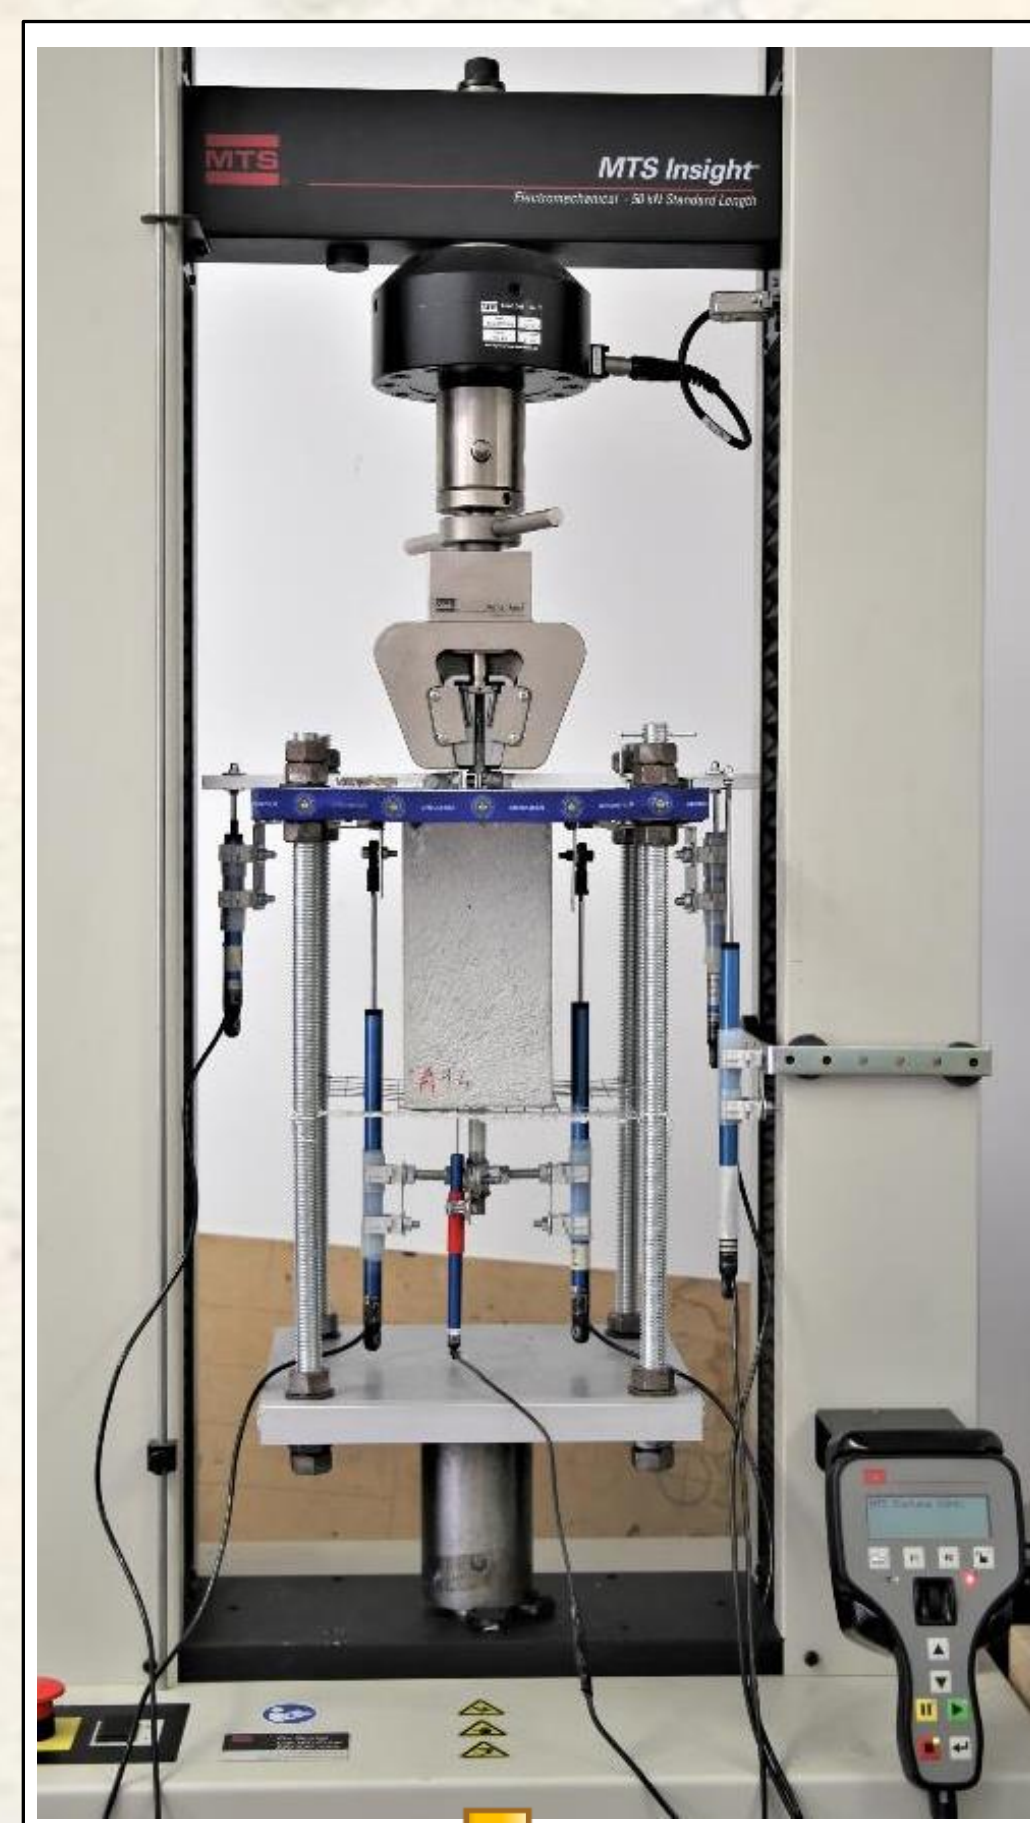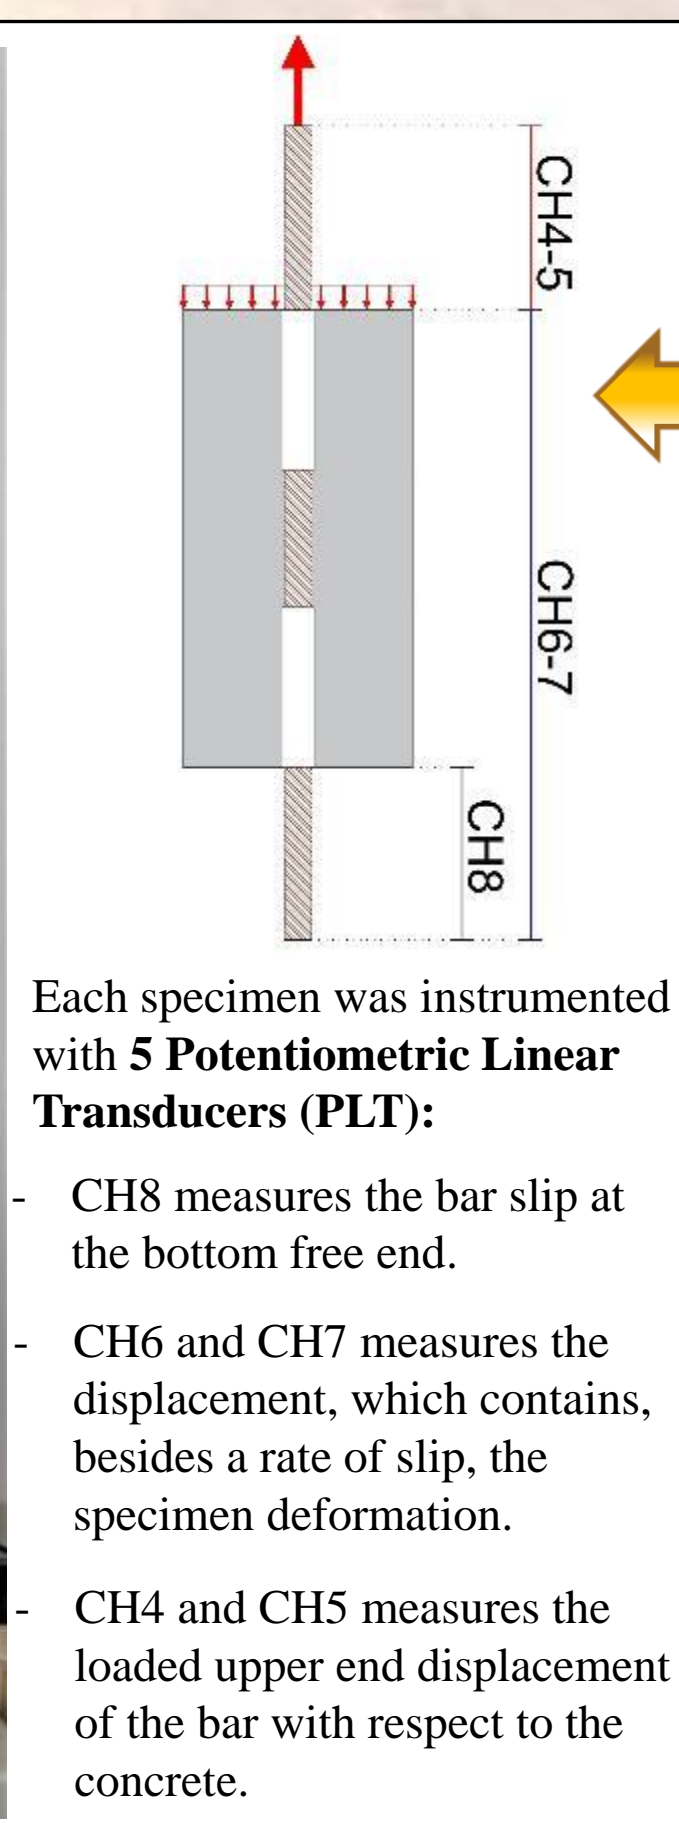

## Crack Width Measuring Process

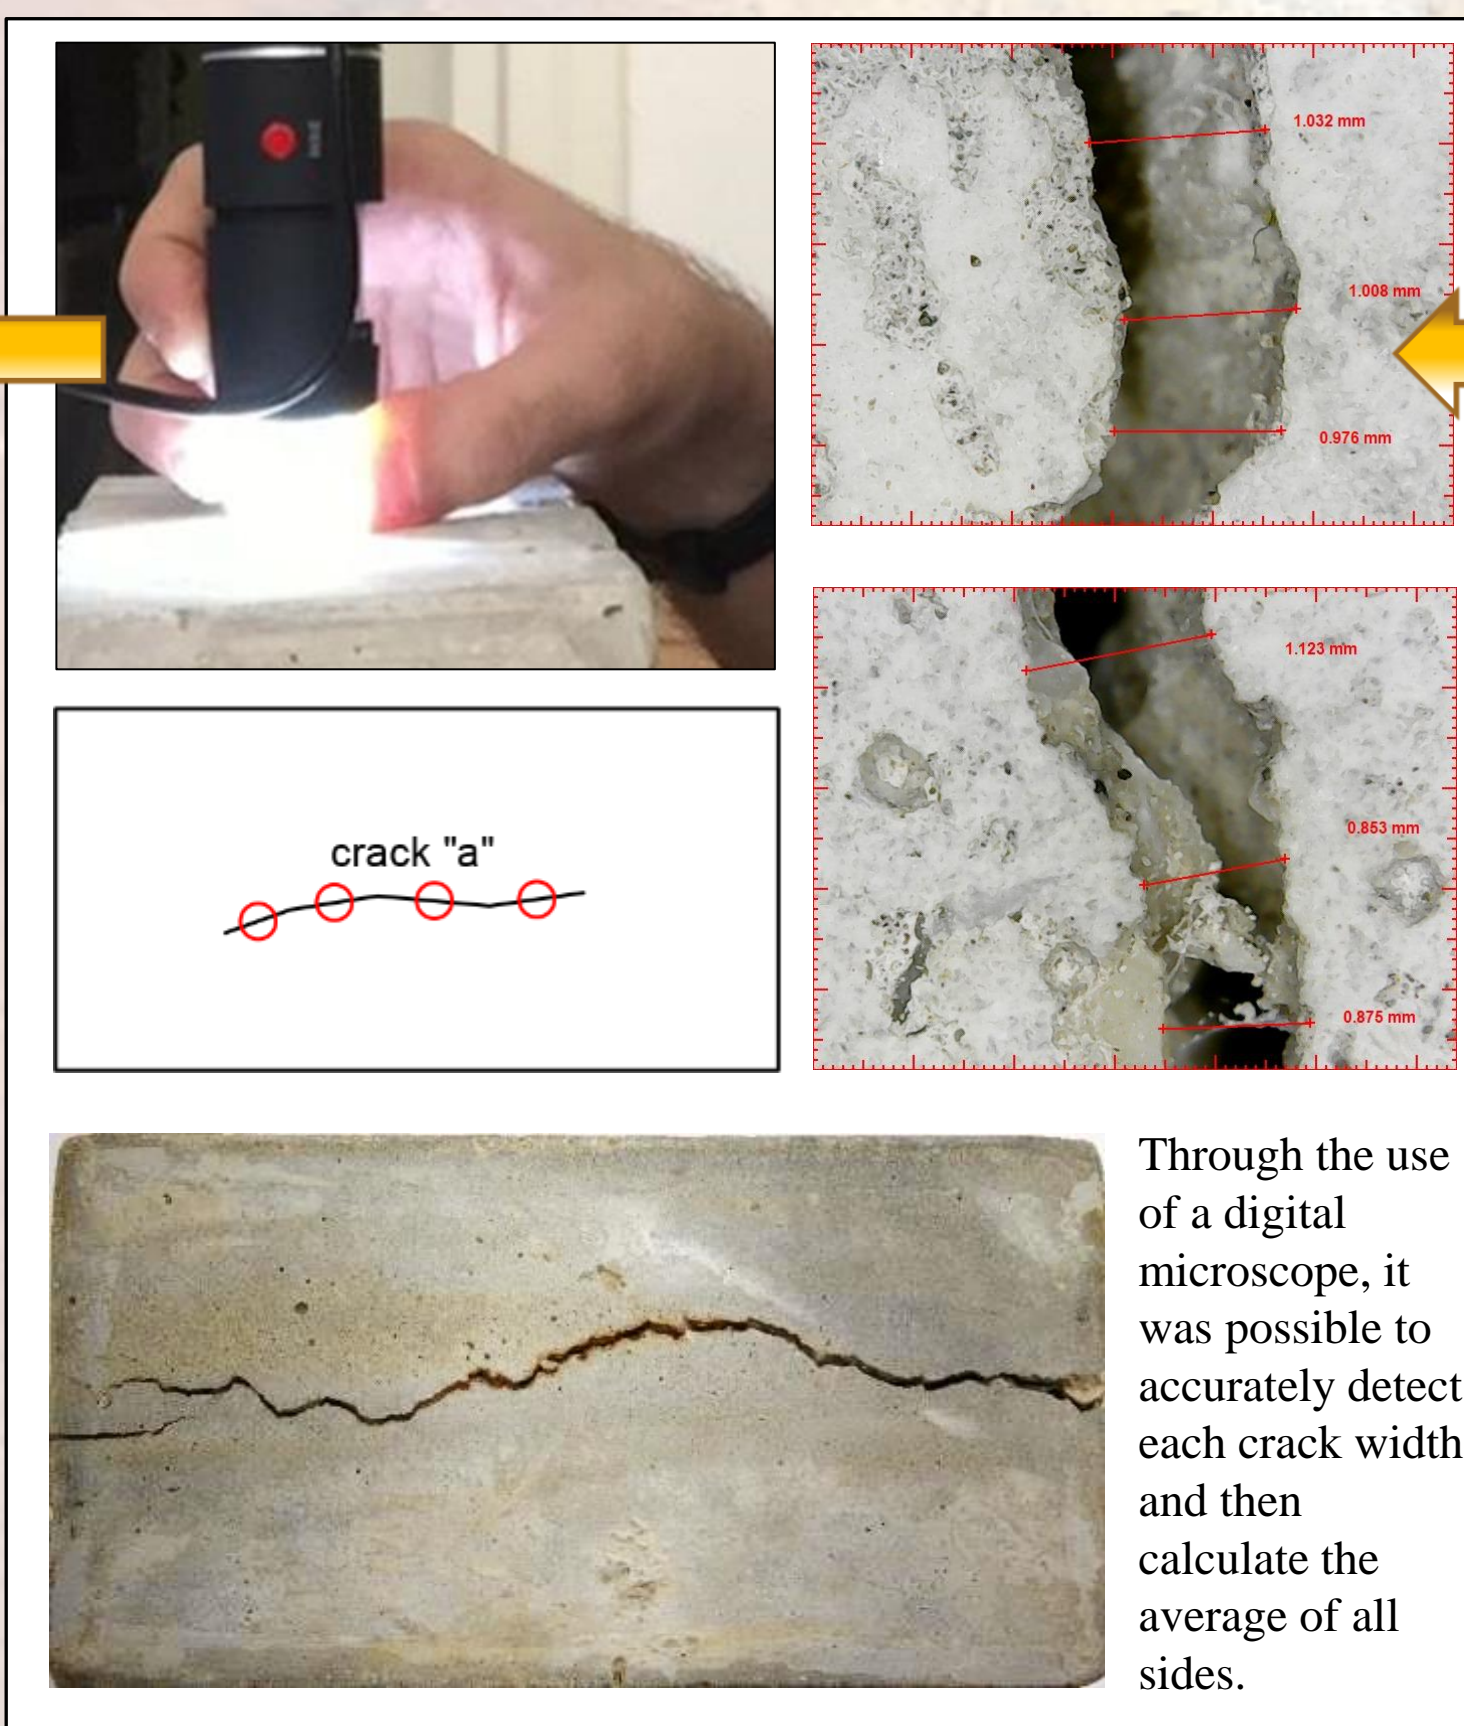

## Accelerated Corrosion Process

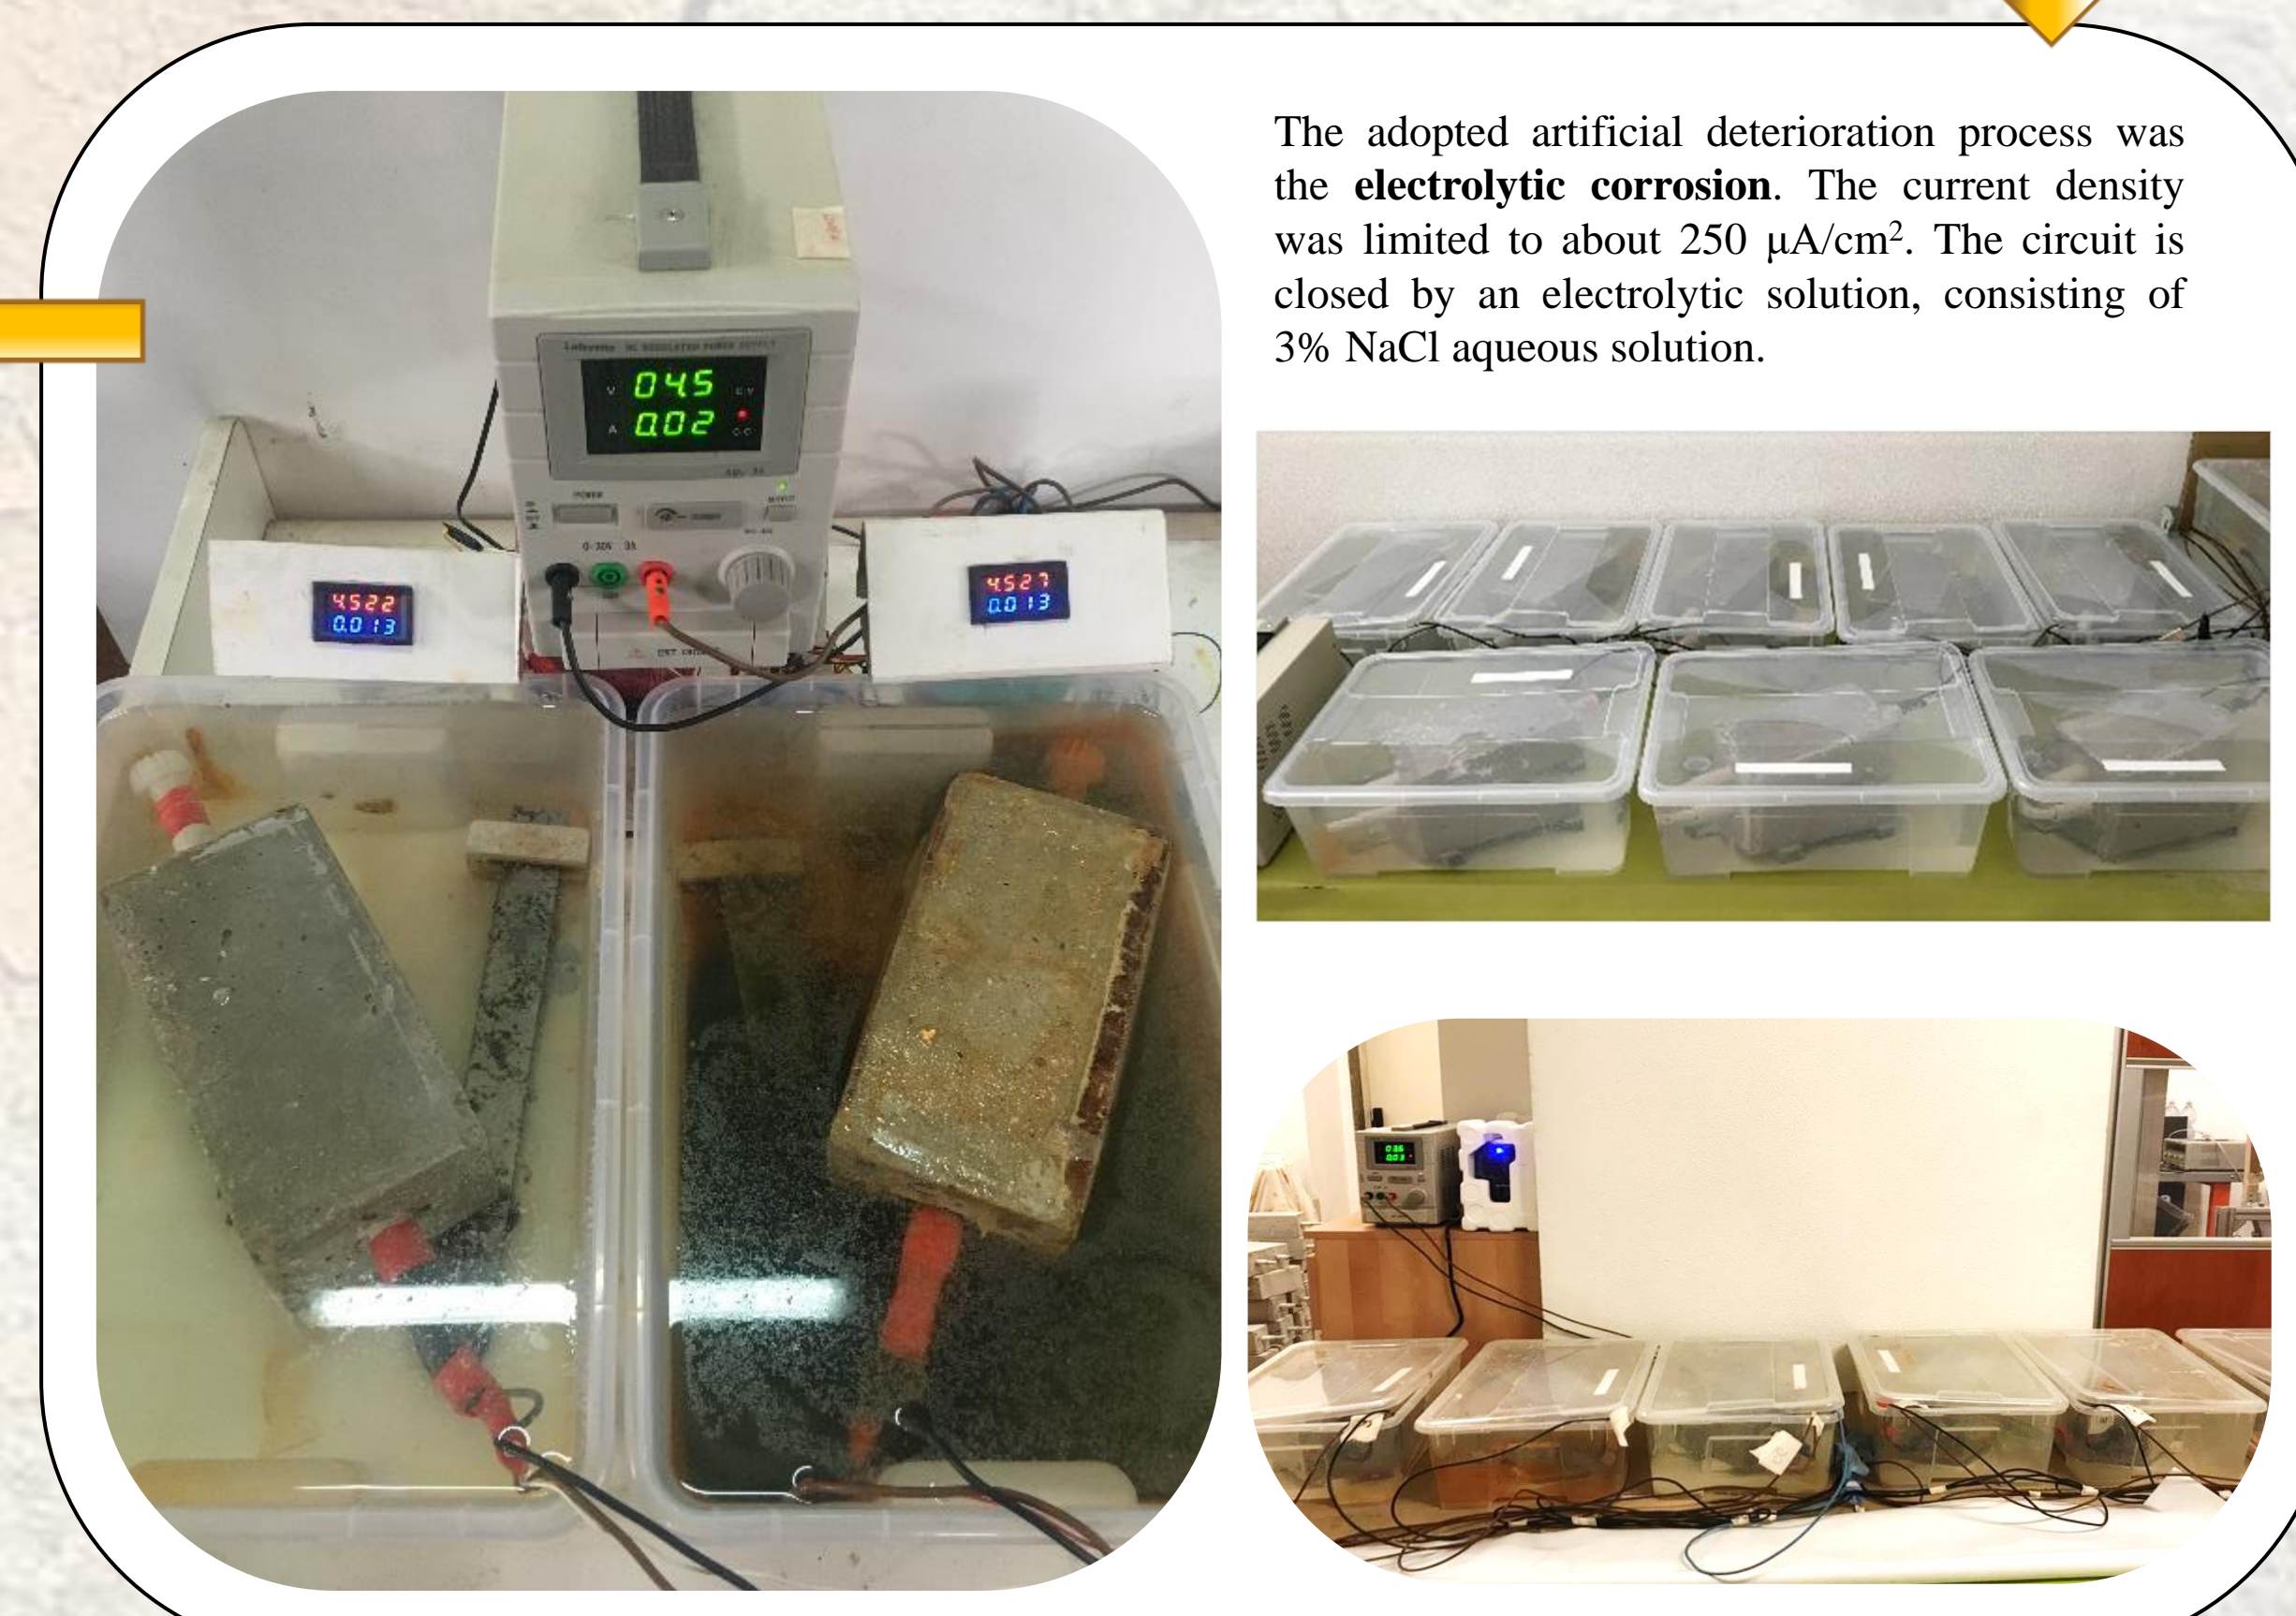

## Main Experimental Results

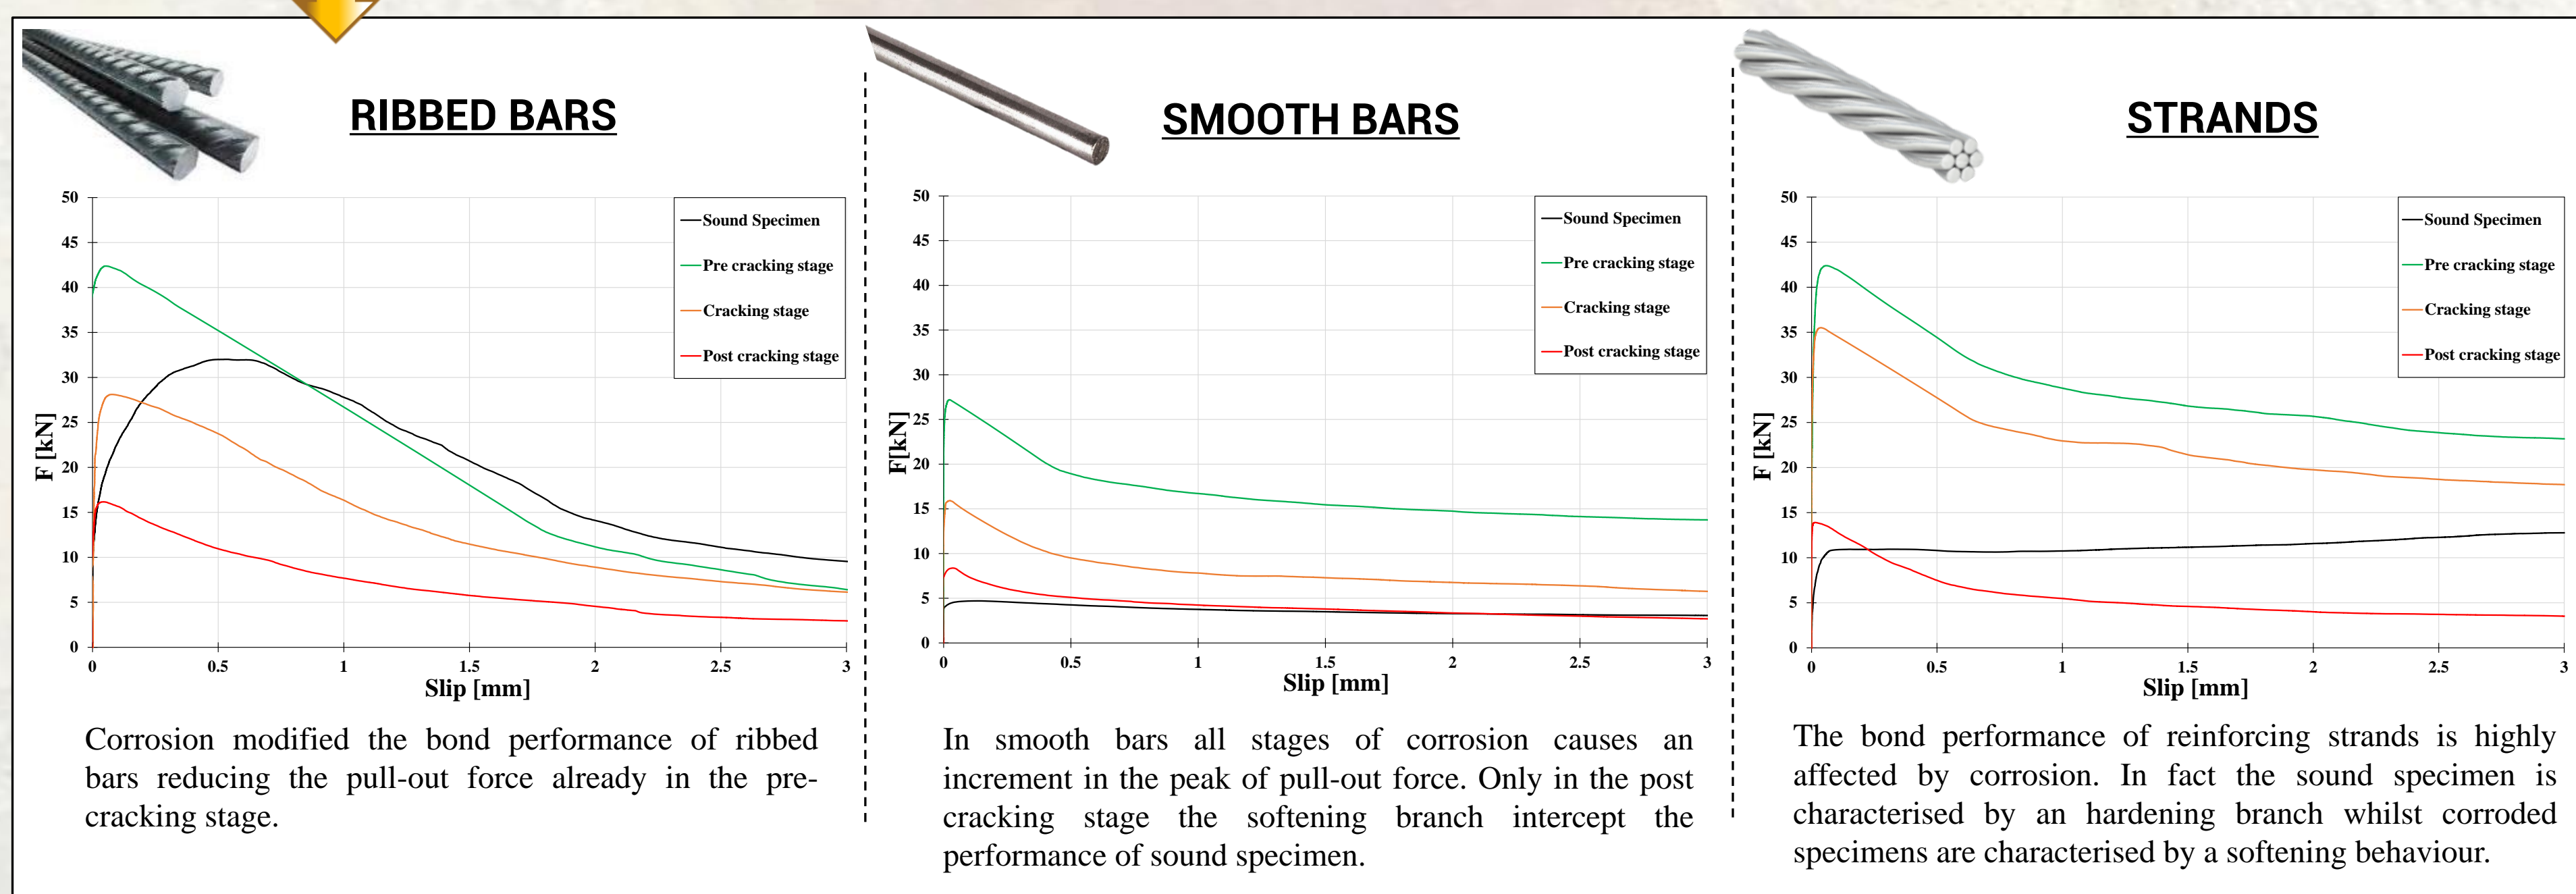

## References

- Benenato, A., Ferracuti, B., Imperatore, S., & Kioumarsi, M. (2020, November). Bond strength of RC elements with con-sideration of corrosion: An experimental survey. In AIP Conference Proceedings (Vol. 2293, No. 1, p. 240010). AIP Publishing LLC.
- Benenato, A., Ferracuti, B., Imperatore, S., & Kioumarsi, M. (2020, December). Experimental tests on bond perfor-mance between corroded plain steel bars and concrete. In CACRCS DAYS 2020. Capacity Assessment of Corroded Reinforced Concrete Structures. Workshop Online, from 1 to 4 December 2020.
- Benenato, A., Ferracuti, B., Kioumarsi, M.; Imperatore, S. (2021). Experimental investigation on the bond-slip behavior of corroded strands. In *Italian Concrete Days 2020. Giornate aicap 2020-Congresso CTE*. Conference Online from 14 to 16 April 2021.
